# Supplementary material
Source: publisher site journal article supplement (https://www.dovepress.com/article/supplementary_file/614816/614816%20Revised%20supplementary%20materials.docx)
Supplement: Supplementary file 1 [file 614816%20Revised%20supplementary%20materials.docx]

**Supplementary Material**

Perifollicular Lymphocytic Inflammation and Fibrosis in Dissecting Cellulitis: Evidence of a Consistent Histopathologic Pattern

Supplementary Table S1. Immunohistochemistry and Pityrosporum Testing in IHC-Evaluable Paired Specimens

| Variable | Overall | Active DCS lesion (N=8) | Matched cNAS (N=8) | Adjusted P value |
| --- | --- | --- | --- | --- |
| Male sex, n (%) | 16 (100) | 8 (100) | 8 (100) | Not tested |
| CD4 score, mean ± SD | 2.50 ± 0.52 | 2.63 ± 0.52 | 2.38 ± 0.52 | 0.4 |
| CD8 score, mean ± SD | 1.06 ± 0.25 | 1.13 ± 0.35 | 1.00 ± 0.00 | 0.4 |
| CD117 score, mean ± SD | 2.00 ± 0.52 | 2.00 ± 0.53 | 2.00 ± 0.53 | >0.9 |
| Pityrosporum positive, among tested specimens | 1/1 (100) | 0/0 (not tested) | 1/1 (100) | Not calculated |

Values are n (%) or mean ± SD. CD4, CD8, and CD117 were recorded using semiquantitative scoring. Denominators reflect IHC-evaluable paired specimens only. P values were adjusted using the Benjamini-Hochberg false-discovery-rate method. Pityrosporum testing was not available for all paired specimens; therefore, no inferential comparison was calculated.

DCS, dissecting cellulitis of the scalp; cNAS, clinically normal-appearing scalp; SD, standard deviation.
